# Supplementary material for: Sustainable Grassland-Management Systems and Their Effects on the Physicochemical Properties of Soil
Source: MDPI journal article supplement (doi:10.3390/plants13060838), 2024-03-14
Supplement: s1 [file s1]

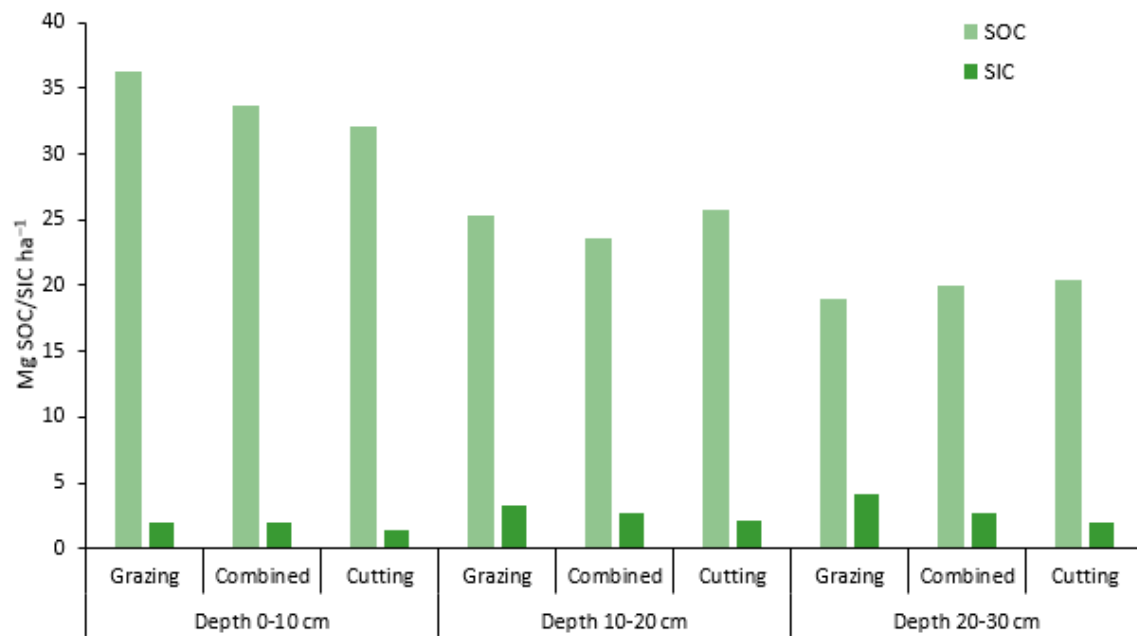

Figure S1: SOC and SIC concentration under three grassland-management systems (cutting, grazing and combined system) at each depth (0–30 cm). SOC—soil organic carbon; SIC—soil inorganic carbon SOC.
